# Supplementary material
Source: Springer Nature journal article supplement (https://www.springermedizin.de/resource/supplementary/13229_2011_31_MOESM1_ESM.pdf/9676010)

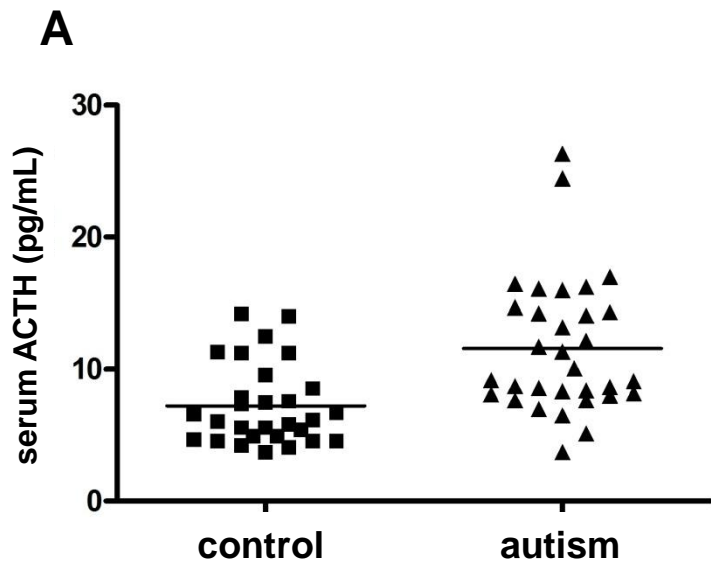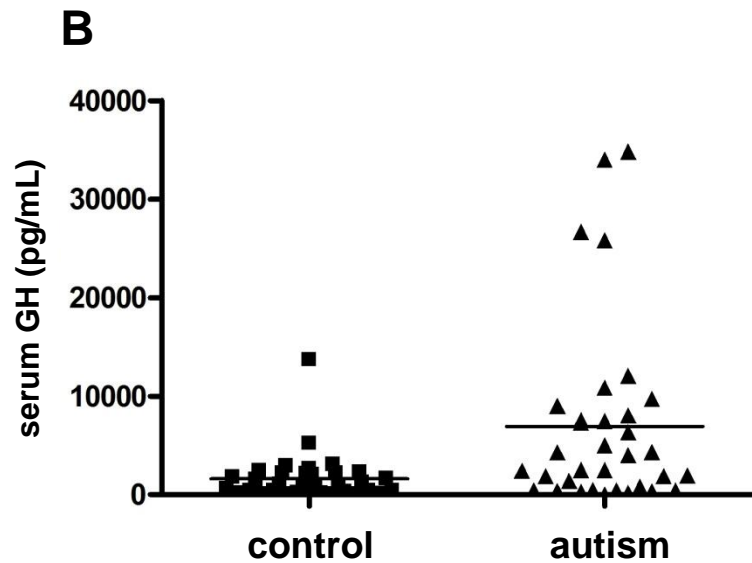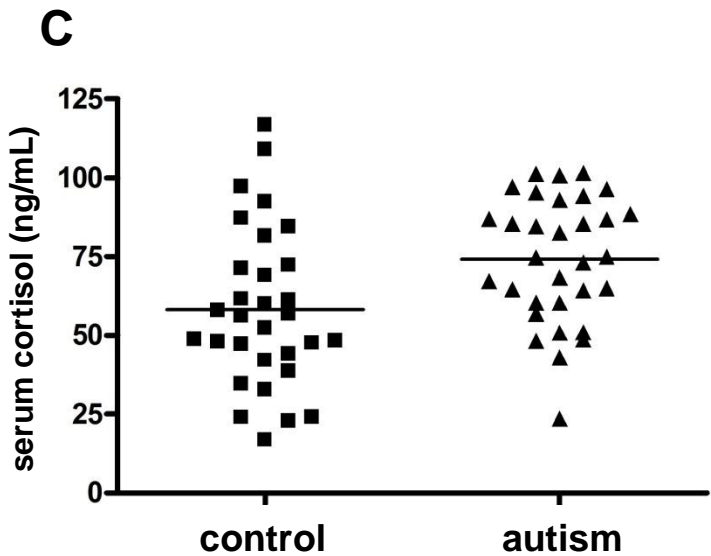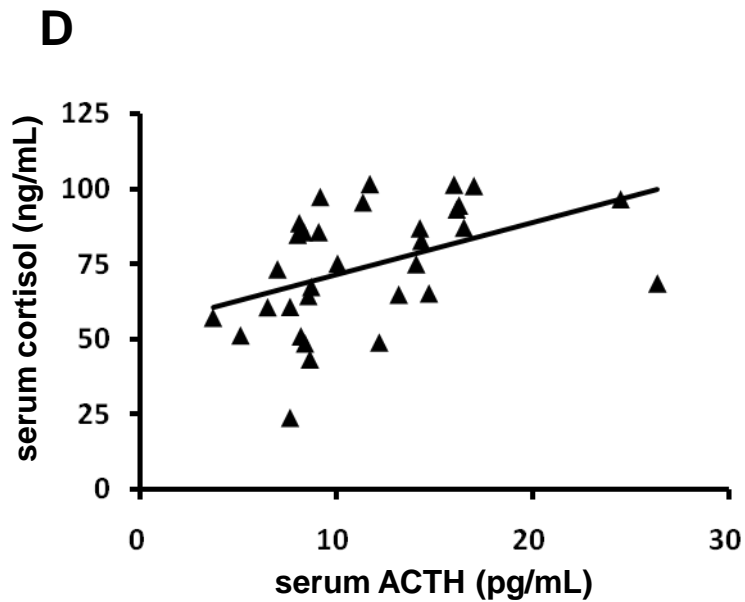

Supplement: MOESM1 [file 9676010]
